# Supplementary material for: Stress-resistant corals may not acclimatize to ocean warming but maintain heat tolerance under cooler temperatures
Source: PubMed Central journal article supplement (PMC6748961; doi:10.1038/s41467-019-12065-0), 2019-09-17
Supplement: 41467_2019_12065_MOESM1_ESM.pdf [file 41467_2019_12065_MOESM1_ESM.pdf]

1 **Supplementary Information**

2

3 Stress-resistant corals may not acclimatize to ocean warming but maintain heat

4 tolerance under cooler temperatures

5

6 Schoepf et al.

7

8 **Supplementary Tables**

9

10 **Supplementary Table 1. Monthly seasonal sea surface temperature (SST) data for the**  
11 **Kimberley region and Ningaloo Reef in Western Australia.** The SST data served as target  
12 temperatures for the acclimation phase of the experiment (see Table S2). Data sourced from  
13 the U.S. National Oceanic and Atmospheric Administration (NOAA), Coral Reef Watch, 5-  
14 km virtual stations “North Western Australia” and “Ningaloo” (version 2).

15

| <b>Month</b> | <b>Experimental month</b> | <b>SST Kimberley (°C)</b> | <b>SST Ningaloo (°C)</b> | <b>SST Difference (°C)</b> |
|--------------|---------------------------|---------------------------|--------------------------|----------------------------|
| January      | 6                         | 30.1                      | 25.1                     | 5.0                        |
| February     | 7                         | 30.2                      | 27.0                     | 3.2                        |
| March        | 8                         | 30.6                      | 27.4                     | 3.2                        |
| April        | Temp. ramp up             | 30.8                      | 27.4                     | 3.4                        |
| May          | Heat stress test          | 29.7                      | 26.3                     | 3.3                        |
| June         |                           | 27.9                      | 24.8                     | 3.1                        |
| July         |                           | 26.1                      | 23.4                     | 2.6                        |
| August       | 1                         | 25.6                      | 22.4                     | 3.3                        |
| September    | 2                         | 26.5                      | 22.1                     | 4.4                        |
| October      | 3                         | 28.0                      | 22.2                     | 5.8                        |
| November     | 4                         | 29.3                      | 23.0                     | 6.4                        |
| December     | 5                         | 29.6                      | 23.9                     | 5.7                        |
| Average      |                           | 28.7                      | 24.6                     | 4.1                        |

16

17

18 **Supplementary Table 2. Average water temperatures during the (a) 9-month**  
 19 **acclimation phase and the subsequent (b) temperature ramp-up and (c) 13-day heat**  
 20 **stress test in treatments with constant daily temperature and with 4°C daily**  
 21 **temperature variability.** Averages are shown  $\pm$ S.D. Sample size (i.e. the number of  
 22 temperature logger measurements) was 8064-8928 for monthly averages, 8262-8352 for the  
 23 temperature ramp up phase, and 3728-3744 for the heat stress phase. The raw data are  
 24 provided in Supplementary Data 1.  
 25

|                                                                    | Native Kimberley              |                  | Warming (Native Kimberley +1°C) |                  | 4°C cooler reef (Ningaloo)    |                               |
|--------------------------------------------------------------------|-------------------------------|------------------|---------------------------------|------------------|-------------------------------|-------------------------------|
|                                                                    | constant                      | variable         | constant                        | variable         | constant                      | variable                      |
| <b>(a) Acclimation phase</b>                                       |                               |                  |                                 |                  |                               |                               |
| Aug. '16                                                           | 25.55 $\pm$ 0.38 <sup>1</sup> | 26.31 $\pm$ 1.26 | 27.21 $\pm$ 0.35                | 26.94 $\pm$ 1.25 | 24.28 $\pm$ 0.91 <sup>2</sup> | 24.27 $\pm$ 1.54 <sup>2</sup> |
| Sept. '16                                                          | 27.14 $\pm$ 0.51              | 27.41 $\pm$ 1.33 | 28.11 $\pm$ 0.51                | 28.11 $\pm$ 1.32 | 22.36 $\pm$ 0.23              | 22.50 $\pm$ 1.32              |
| Oct. '16                                                           | 28.62 $\pm$ 0.41              | 28.97 $\pm$ 1.22 | 29.59 $\pm$ 0.38                | 29.68 $\pm$ 1.24 | 22.53 $\pm$ 0.26              | 22.80 $\pm$ 1.30              |
| Nov. '16                                                           | 29.18 $\pm$ 0.69              | 29.46 $\pm$ 1.30 | 30.11 $\pm$ 0.47                | 30.22 $\pm$ 1.31 | 23.16 $\pm$ 0.79              | 23.23 $\pm$ 1.45              |
| Dec. '16                                                           | 29.86 $\pm$ 0.25              | 29.97 $\pm$ 1.18 | 30.95 $\pm$ 0.29                | 30.81 $\pm$ 1.17 | 24.47 $\pm$ 0.42              | 24.54 $\pm$ 1.32              |
| Jan. '17                                                           | 30.21 $\pm$ 0.46              | 30.49 $\pm$ 1.18 | 31.33 $\pm$ 0.28                | 31.41 $\pm$ 1.19 | 25.75 $\pm$ 0.56              | 25.58 $\pm$ 1.44              |
| Feb. '17                                                           | 30.72 $\pm$ 0.23              | 30.71 $\pm$ 1.19 | 29.72 $\pm$ 0.59                | 30.18 $\pm$ 1.31 | 27.44 $\pm$ 0.33              | 27.33 $\pm$ 1.36              |
| Mar. '17                                                           | 30.71 $\pm$ 0.28              | 31.06 $\pm$ 1.19 | 29.61 $\pm$ 0.76                | 30.05 $\pm$ 1.19 | 27.60 $\pm$ 0.22              | 27.83 $\pm$ 1.22              |
| 1-17                                                               | 30.69 $\pm$ 0.31              | 30.90 $\pm$ 1.20 | 29.67 $\pm$ 0.27                | 29.97 $\pm$ 1.20 | 27.61 $\pm$ 0.22              | 27.59 $\pm$ 1.22              |
| April '17                                                          |                               |                  |                                 |                  |                               |                               |
| <b>(b) Temperature ramp-up (18 April – 16 May '17)<sup>3</sup></b> |                               |                  |                                 |                  |                               |                               |
| Ambient                                                            | 30.41 $\pm$ 0.45              | 30.26 $\pm$ 1.30 | 29.84 $\pm$ 0.47                | 29.97 $\pm$ 1.22 | 26.63 $\pm$ 0.41              | 26.73 $\pm$ 1.27              |
| Heated                                                             | 30.45 $\pm$ 0.69              | 30.99 $\pm$ 1.22 | 30.39 $\pm$ 1.04                | 30.47 $\pm$ 1.49 | 30.02 $\pm$ 1.29              | 30.00 $\pm$ 1.78              |
| <b>(c) Heat stress test (17-29 May '17)</b>                        |                               |                  |                                 |                  |                               |                               |
| Ambient                                                            | 29.81 $\pm$ 0.37              | 30.00 $\pm$ 1.17 | 29.92 $\pm$ 0.34                | 29.90 $\pm$ 1.14 | 26.37 $\pm$ 0.21              | 26.50 $\pm$ 1.19              |
| Heated                                                             | 32.28 $\pm$ 0.38              | 32.37 $\pm$ 1.16 | 32.50 $\pm$ 0.43                | 32.42 $\pm$ 1.17 | 32.31 $\pm$ 0.41              | 32.41 $\pm$ 1.14              |

26 <sup>1</sup>Note that values were lower than target values due to temperature probe issues

27 <sup>2</sup>Temperatures were gradually lowered over 4 weeks to prevent cold-shocking corals

28 <sup>3</sup>Note that average temperature and SD differ across heated tanks because the temperature ramp up started at  
 29 different time points and seasonal baseline temperatures for the various temperature treatments (see Methods for  
 30 more details).  
 31

32

33 **Supplementary Table 3. Results from generalized linear mixed models to test for the**  
34 **effects of temperature (temp.), temperature variability (var.) and time on the**  
35 **photochemical efficiency (Fv/Fm), calcification rate (calc.), P/R ratios and health chart**  
36 **scores of *Acropora aspera* during the acclimation phase.** Post hoc Tukey tests results are  
37 given when main effects (but no interaction terms) were significant. Effects with p-values  
38  $\leq 0.05$  are highlighted in bold. Num df = numerator degrees of freedom, den df = denominator  
39 degrees of freedom. Var. = variable. The data underlying these statistical analyses are the  
40 same as for Figs 2-4 and Supplementary Fig 2.  
41

| <b>Var.</b>   | <b>Effect</b>     | <b>Num df</b> | <b>Den df</b> | <b>F-statistic</b> | <b>p-value</b>    | <b>Tukey</b>                             |
|---------------|-------------------|---------------|---------------|--------------------|-------------------|------------------------------------------|
| <b>Fv/Fm</b>  | Temp              | 2             | 749           | 48.57              | <b>&lt;0.0001</b> |                                          |
|               | Time              | 13            | 749           | 49.39              | <b>&lt;0.0001</b> |                                          |
|               | Temp * time       | 23            | 749           | 9.36               | <b>&lt;0.0001</b> | See text                                 |
|               | Var               | 1             | 749           | 113.44             | <b>&lt;0.0001</b> |                                          |
|               | Temp * var        | 2             | 749           | 9.33               | <b>&lt;0.0001</b> | See text                                 |
|               | Var * time        | 13            | 749           | 8.21               | <b>&lt;0.0001</b> | See text                                 |
|               | Temp * var * time | 23            | 749           | 1.53               | 0.0532            |                                          |
| <b>Calc.</b>  | Temp              | 2             | 511           | 5.34               | <b>0.0051</b>     |                                          |
|               | Time              | 8             | 511           | 28.60              | <b>&lt;0.0001</b> | See text                                 |
|               | Temp * time       | 16            | 511           | 4.39               | <b>&lt;0.0001</b> | See text                                 |
|               | Var               | 1             | 511           | 14.43              | <b>0.0002</b>     |                                          |
|               | Temp * var        | 2             | 511           | 9.20               | <b>0.0001</b>     | See text                                 |
|               | Var * time        | 8             | 511           | 3.12               | <b>0.0019</b>     | See text                                 |
|               | Temp * var * time | 16            | 511           | 1.63               | 0.0568            |                                          |
| <b>P/R</b>    | Temp              | 2             | 38            | 7.81               | <b>0.0014</b>     | native ><br>warming =<br>4°C cooler reef |
|               | Time              | 1             | 38            | 0.29               | 0.5925            |                                          |
|               | Temp * time       | 2             | 38            | 3.01               | 0.0613            |                                          |
|               | Var               | 1             | 38            | 6.27               | <b>0.0167</b>     | Constant ><br>variable                   |
|               | Temp * var        | 2             | 38            | 0.02               | 0.9767            |                                          |
|               | Var * time        | 1             | 38            | 2.85               | 0.0997            |                                          |
|               | Temp * var * time | 2             | 38            | 0.95               | 0.3959            |                                          |
| <b>Health</b> | Temp              | 2             | 672           | 6.36               | <b>0.0018</b>     |                                          |
|               | Time              | 11            | 672           | 45.68              | <b>&lt;0.0001</b> |                                          |
|               | Temp * time       | 21            | 672           | 15.22              | <b>&lt;0.0001</b> | See text                                 |
|               | Var               | 1             | 672           | 13.05              | <b>0.0003</b>     |                                          |
|               | Temp * var        | 2             | 672           | 13.53              | <b>&lt;0.0001</b> | See text                                 |
|               | Var * time        | 11            | 672           | 2.42               | <b>0.0060</b>     | See text                                 |
|               | Temp * var * time | 21            | 672           | 1.16               | 0.2817            |                                          |

42 **Supplementary Table 4. Results from generalized linear mixed models to test for the**  
43 **effects of temperature (temp.), temperature variability (var.), heat stress and time (if**  
44 **applicable) on the photochemical efficiency (Fv/Fm), calcification rate (calc.), P/R ratios**  
45 **and health chart scores of *Acropora aspera* during the heat stress test.** Calcification, P/R  
46 and coral health were only measured at the end of the heat stress test. Post hoc Tukey tests  
47 results are given when main effects (but no interaction terms) were significant. Effects with  
48 p-values  $\leq 0.05$  are highlighted in bold. Num df = numerator degrees of freedom, den df =  
49 denominator degrees of freedom. Var. = variable. The data underlying these statistical  
50 analyses are the same as for Figs 5-6 and Supplementary Fig 2.

51

| <b>Var.</b>  | <b>Effect</b>               | <b>Num df</b> | <b>Den df</b> | <b>F-statistic</b> | <b>p-value</b>    | <b>Tukey</b>           |
|--------------|-----------------------------|---------------|---------------|--------------------|-------------------|------------------------|
| <b>Fv/Fm</b> | Temp                        | 2             | 645           | 32.51              | <b>&lt;0.0001</b> |                        |
|              | Var                         | 1             | 645           | 50.71              | <b>&lt;0.0001</b> |                        |
|              | Temp * var                  | 2             | 645           | 4.78               | <b>0.0087</b>     | See text               |
|              | Heat                        | 1             | 645           | 86.65              | <b>&lt;0.0001</b> |                        |
|              | Temp * heat                 | 2             | 645           | 7.89               | <b>0.0004</b>     | See text               |
|              | Var * heat                  | 1             | 645           | 15.90              | <b>&lt;0.0001</b> | See text               |
|              | Temp * var * heat           | 2             | 645           | 1.57               | 0.2092            |                        |
|              | Time                        | 13            | 645           | 38.61              | <b>&lt;0.0001</b> | See text               |
|              | Temp * time                 | 26            | 645           | 0.94               | 0.5442            |                        |
|              | Var * time                  | 13            | 645           | 0.85               | 0.6087            |                        |
|              | Temp * var * time           | 26            | 645           | 0.41               | 0.9962            |                        |
|              | Heat * time                 | 13            | 645           | 28.29              | <b>&lt;0.0001</b> | See text               |
|              | Temp * heat *<br>time       | 26            | 645           | 0.87               | 0.6484            |                        |
|              | Var * heat * time           | 13            | 645           | 1.26               | 0.2314            |                        |
|              | Temp * var * heat<br>* time | 26            | 645           | 0.28               | 0.9999            |                        |
| <b>Calc.</b> | Temp                        | 2             | 37            | 7.14               | <b>0.0024</b>     |                        |
|              | Var                         | 1             | 37            | 27.60              | <b>&lt;0.0001</b> | Constant ><br>variable |
|              | Temp * var                  | 2             | 37            | 0.86               | 0.4333            |                        |
|              | Heat                        | 1             | 37            | 5.51               | <b>0.0244</b>     |                        |
|              | Temp * heat                 | 2             | 37            | 9.53               | <b>0.0005</b>     | See text               |
|              | Var * heat                  | 1             | 37            | 2.83               | 0.1009            |                        |
|              | Temp * var * heat           | 2             | 37            | 0.30               | 0.7454            |                        |
| <b>P/R</b>   | Temp                        | 2             | 24            | 0.89               | 0.4236            |                        |
|              | Var                         | 1             | 24            | 2.07               | 0.1629            |                        |
|              | Temp * var                  | 2             | 24            | 0.22               | 0.8015            |                        |
|              | Heat                        | 1             | 24            | 64.18              | <b>&lt;0.0001</b> |                        |

|               |                   |   |    |        |                   |          |
|---------------|-------------------|---|----|--------|-------------------|----------|
|               | Temp * heat       | 2 | 24 | 0.40   | 0.6739            |          |
|               | Var * heat        | 1 | 24 | 12.26  | <b>0.0018</b>     | See text |
|               | Temp * var * heat | 2 | 24 | 0.49   | 0.6215            |          |
| <b>Health</b> | Temp              | 2 | 37 | 0.92   | 0.4067            |          |
|               | Var               | 1 | 37 | 0.15   | 0.6965            |          |
|               | Temp * var        | 2 | 37 | 2.28   | 0.1163            |          |
|               | Heat              | 1 | 37 | 261.52 | <b>&lt;0.0001</b> |          |
|               | Temp * heat       | 2 | 37 | 6.56   | <b>0.0036</b>     | See text |
|               | Var * heat        | 1 | 37 | 6.87   | <b>0.0126</b>     | See text |
|               | Temp * var * heat | 2 | 37 | 4.26   | <b>0.0216</b>     | See text |

52

53

54 **Supplementary Figures**

55

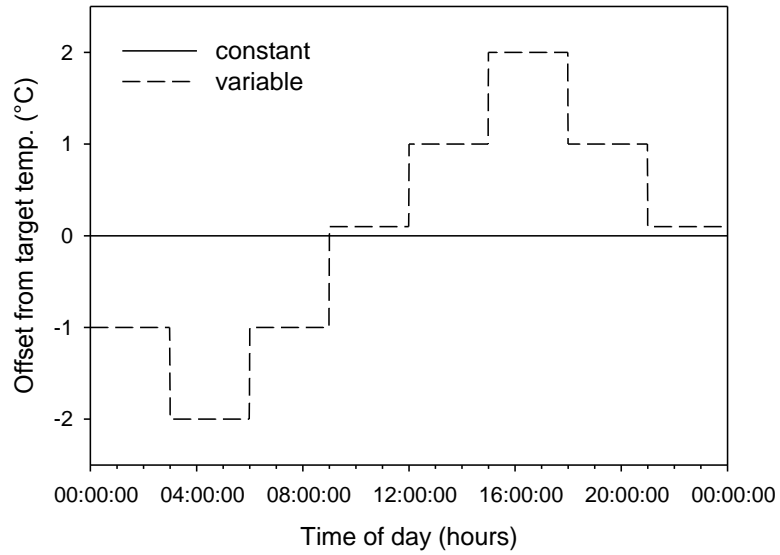

56

57

58 **Supplementary Figure 1: Schematic of the temperature regimes in treatments with**  
59 **constant daily temperature versus 4°C daily variability.**

60

### Acclimation phase

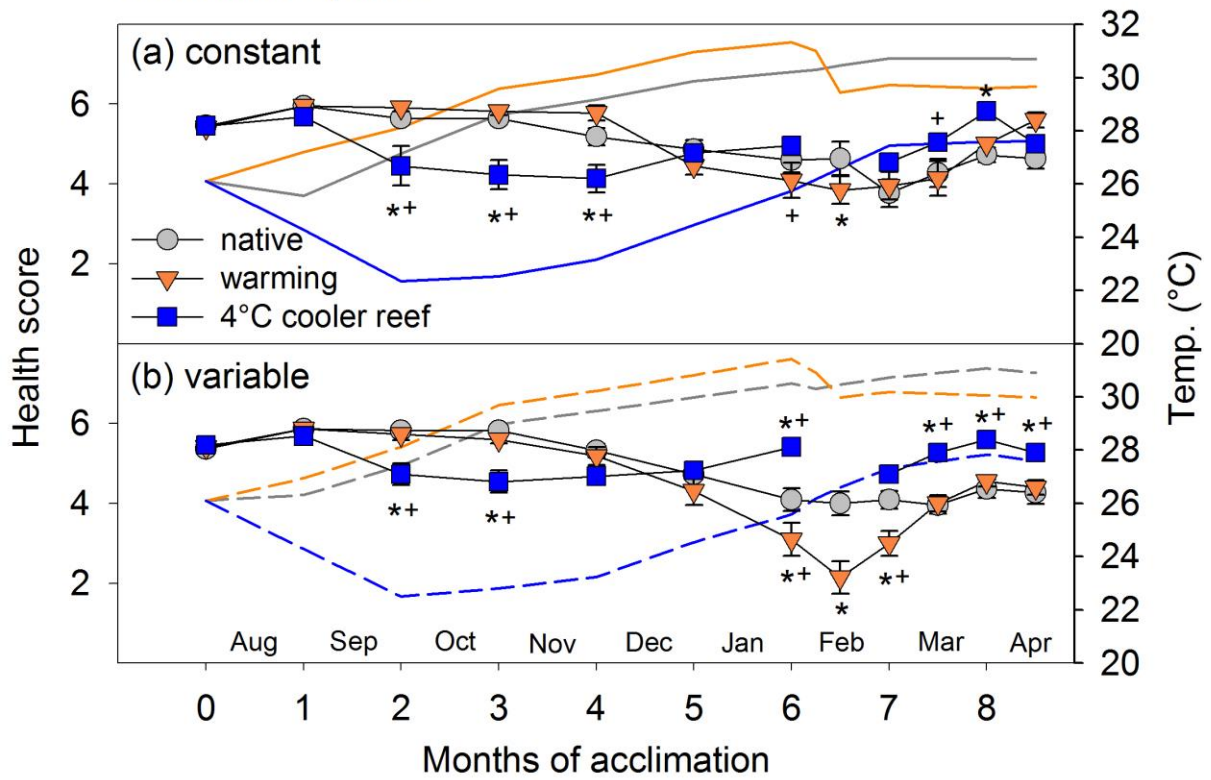

### End of heat stress test

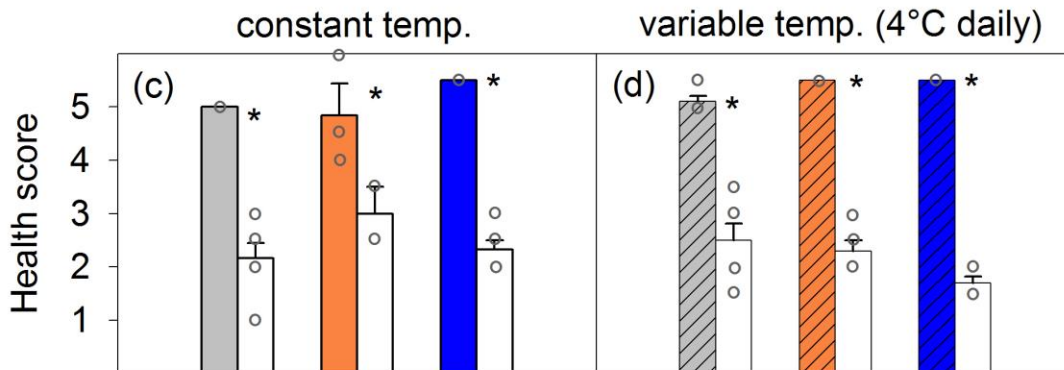



62 **Supplementary Figure 2. Coral health chart score during the acclimation phase and at**  
63 **the end of the heat stress test.** *Acropora aspera* corals were maintained under (a, c) constant  
64 daily temperatures or (b, d) 4°C daily temperature variability. Mean  $\pm$  1S.E.M. is shown. For  
65 bar charts, grey circles indicate individual data points. Higher values indicate greater coral  
66 health. In panels a and b, solid and dashed lines represent monthly tank temperatures for each  
67 treatment (Table S2). Asterisks indicate a significant difference from the native (control)  
68 treatment, whereas + indicates a significant difference between the warming and 4°C cooler  
69 reef treatments ( $p < 0.05$ ; Tukey posthoc tests). Note that 4°C cooler reef corals were not  
70 assessed at month 6.5 In panels c and d, open bars represent heat-stressed corals at each  
71 treatment, whereas asterisks indicate a significant difference between ambient and heat-  
72 stressed corals at each treatment ( $p < 0.05$ ; Tukey posthoc tests). Source data are provided as a  
73 Source Data file.  
74

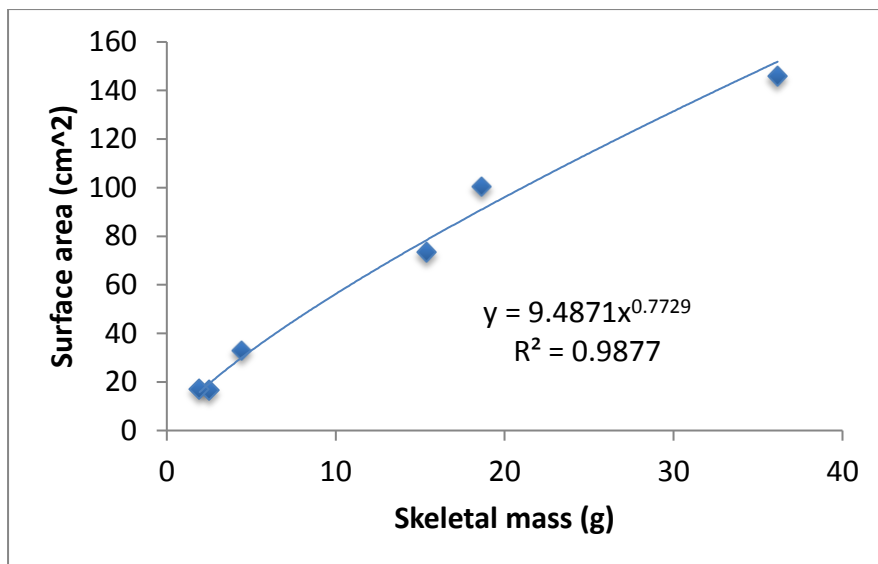

75

76

77 **Supplementary Figure 3. Relationship between coral skeletal mass and CT-based**

78 **surface area.** Corals of the species *Acropora aspera* from Cygnet Bay, Kimberley region,

79 NW Australia, were used for this calibration. Source data are provided as a Source Data file.

80

81
